# Supplementary material for: Multiple pH responsive zwitterionic micelles for stealth delivery of anticancer drugs
Source: Royal Society of Chemistry journal article supplement (doi:10.1039/c6ra11645k), 2016-01-01
Supplement: c6ra11645k1.pdf [file c6ra11645k1.pdf]

## Supporting Information

### **Multiple pH responsive zwitterionic micelles for stealth delivery of anticancer drugs**

Jin Ma,<sup>†</sup> Ke Kang,<sup>†</sup> Qiangying Yi,<sup>\*,†</sup> Zhirong Zhang,<sup>‡</sup> and Zhongwei Gu<sup>\*,†</sup>

<sup>†</sup>National Engineering Research Center for Biomaterials, Sichuan University, 29 Wangjiang Road, Chengdu 610064, China

<sup>‡</sup>West China school of pharmacy, Sichuan University, China

Corresponding authors: [qyi@scu.edu.cn](mailto:qyi@scu.edu.cn), +86-028-85410653

[zwgu@scu.edu.cn](mailto:zwgu@scu.edu.cn), +86-028-85410336

Table S1. Molecular weight measured by GPC.

| Polymer            | Mn (Da) | Poly Dispersity Index (PDI) |
|--------------------|---------|-----------------------------|
| pCBMA-p(ADA-TMDP)  | 15300   | 1.24                        |
| pDMAEM-p(ADA-TMDP) | 16100   | 1.20                        |

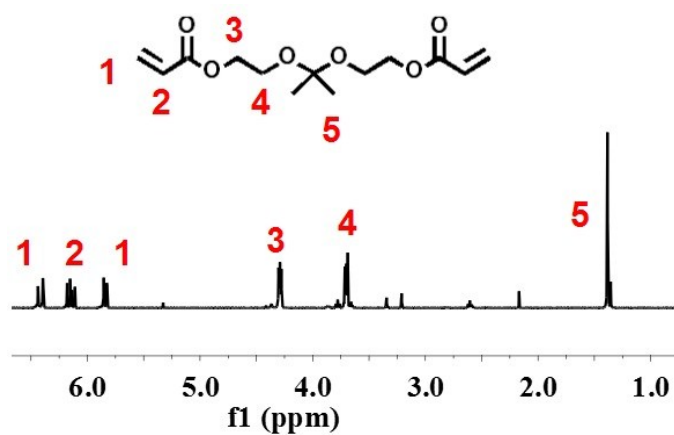

Figure S1. <sup>1</sup>H-NMR spectrum of ADA (CDCl<sub>3</sub>, 400 MHz).

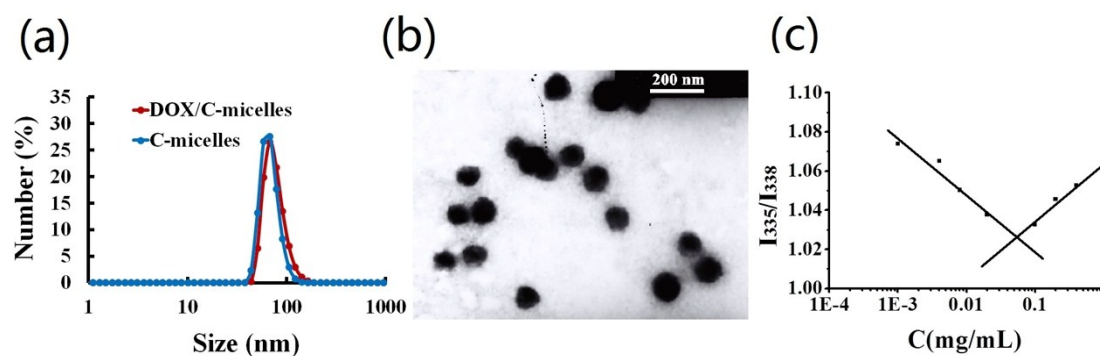

Figure S2. Characterizations of the C-micelles and DOX/C-micelles. (a) Size distribution of C-micelles (red) and DOX/C-micelles (blue) in PBS solution. (b) TEM images of DOX/C-micelles. \*Scale bar measures 200 nm. (c) Critical micelle concentration of the micelles.

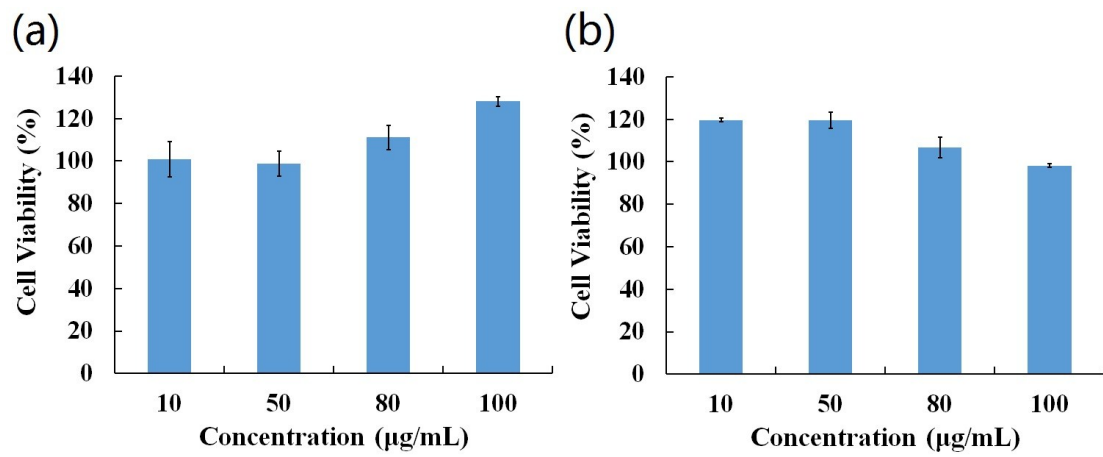

Figure S3. In vitro cytotoxicity of C-micelles against (a) 3T3 cells and (b) HepG2 cells after incubation for 36 h.

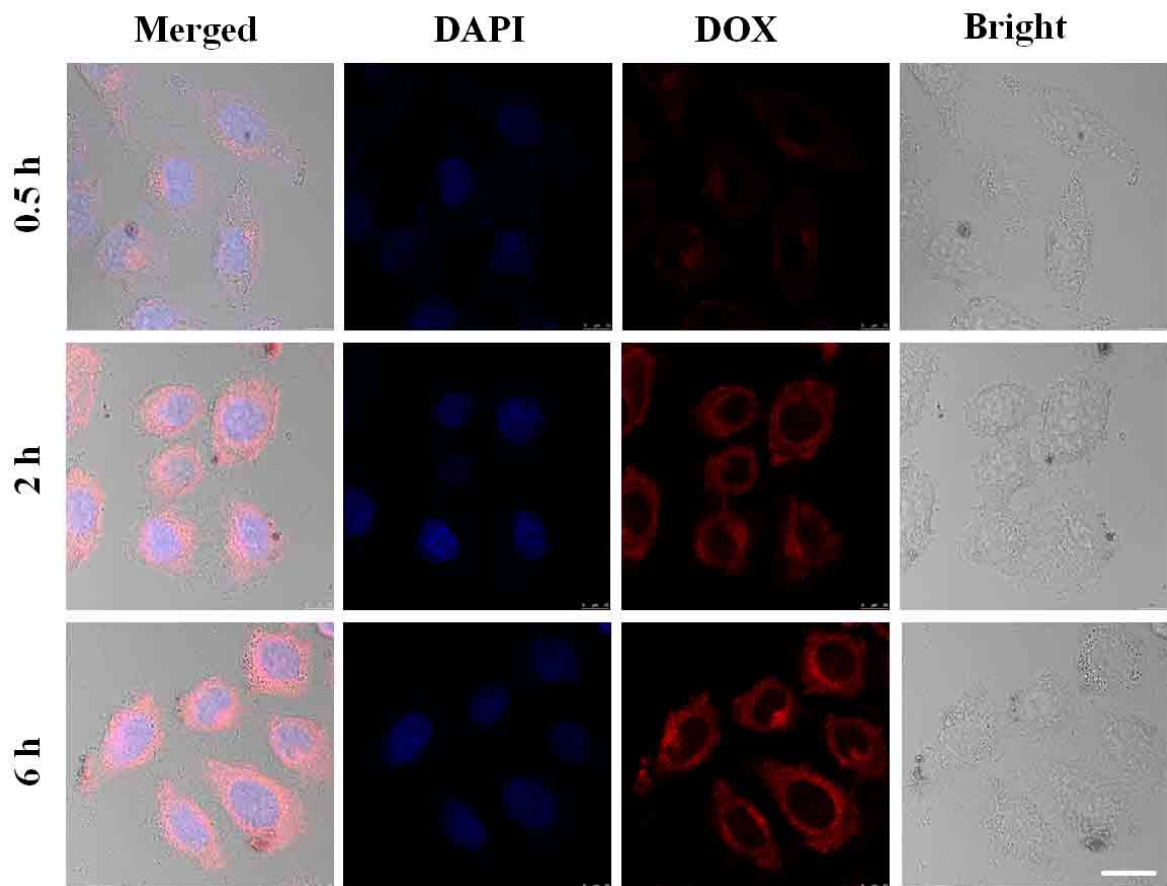

Figure S4. CLSM of DOX/C-micelles (5 µg/ml DOX) at 0.5 h, 2 h, 6 h. DOX channel (red), DAPI stained nucleus channel (blue), bright images and overlay of previous images. Scale bar measures 20 µm.
